# Supplementary material for: Computer aided chemical design: using quantum chemical calculations to predict properties of a series of halochromic guaiazulene derivatives
Source: PubMed Central journal article supplement (PMC5180112; doi:10.1098/rsos.160373), 2016-11-23
Supplement: rsos160373supp1.pdf [file rsos160373supp1.pdf]

**Computer Aided Chemical Design: Using Quantum Chemical  
Calculations to Predict Properties of a Series of Halochromic  
Guaiazulene Derivatives**

Adam W. Woodward,<sup>1</sup> Ebrahim H. Ghazvini Zadeh,<sup>1</sup> Mykhailo V. Bondar,<sup>2</sup> and  
Kevin D. Belfield<sup>\*3,4</sup>

<sup>1</sup>*Department of Chemistry, University of Central Florida, Orlando, FL 32816-2366, USA*

<sup>2</sup>*Institute of Physics NASU, Prospect Nauki, 46, Kiev-28, 03028, Ukraine*

<sup>3</sup>*College of Science and Liberal Arts, New Jersey Institute of Technology, University Heights,  
Newark, NJ 07102, USA*

<sup>4</sup>*School of Chemistry and Chemical Engineering, Shaanxi Normal University, Xi'an,  
710062, PRC*

\* To whom correspondence should be addressed e-mail: [belfield@njit.edu](mailto:belfield@njit.edu)

|                                                |           |
|------------------------------------------------|-----------|
| TD-DFT data                                    | S2 – S7   |
| Frontier molecular orbitals                    | S8 – S10  |
| <sup>1</sup> H and <sup>13</sup> C NMR spectra | S11 – S19 |

Table S1: Calculated properties for the first 15 transitions for **3a** as determined by TD-DFT<sup>a</sup>

| Transition no. | Energy /eV | Wavelength /nm | Oscillator strength | Leading configuration |      |
|----------------|------------|----------------|---------------------|-----------------------|------|
| 1              | 1.97       | 629            | 0.03                | H -> L                | 0.96 |
| 2              | 3.08       | 403            | 0.43                | H-1 -> L              | 0.81 |
|                |            |                |                     | H -> L+1              | 0.15 |
| 3              | 3.31       | 375            | 0.13                | H-2 -> L              | 0.31 |
|                |            |                |                     | H-1 -> L              | 0.14 |
|                |            |                |                     | H -> L+1              | 0.51 |
| 4              | 3.75       | 331            | 0.02                | H-2 -> L              | 0.25 |
|                |            |                |                     | H -> L+1              | 0.03 |
|                |            |                |                     | H -> L+2              | 0.58 |
|                |            |                |                     | H -> L+3              | 0.11 |
| 5              | 3.88       | 320            | 0.30                | H-1 -> L+1            | 0.90 |
| 6              | 4.02       | 309            | 0.03                | H -> L+2              | 0.25 |
|                |            |                |                     | H -> L+3              | 0.65 |
| 7              | 4.23       | 293            | 0.22                | H-2 -> L              | 0.22 |
|                |            |                |                     | H-2 -> L+1            | 0.13 |
|                |            |                |                     | H-1 -> H+2            | 0.14 |
|                |            |                |                     | H -> L+1              | 0.15 |
|                |            |                |                     | H -> L+3              | 0.17 |
| 8              | 4.32       | 287            | 0.01                | H-3 -> L              | 0.48 |
|                |            |                |                     | H-1 -> L+2            | 0.25 |
|                |            |                |                     | H-1 -> L+3            | 0.17 |
| 9              | 4.54       | 273            | 0.02                | H-4 -> L              | 0.36 |
|                |            |                |                     | H-2 -> L              | 0.42 |
| 10             | 4.67       | 265            | 0.04                | H-3 -> L              | 0.38 |
|                |            |                |                     | H-1 -> L+2            | 0.32 |
| 11             | 4.90       | 253            | 0.60                | H-2 -> L              | 0.10 |
|                |            |                |                     | H-1 -> L+2            | 0.12 |
|                |            |                |                     | H-1 -> L+3            | 0.58 |
| 12             | 5.04       | 246            | 0.26                | H-4 -> L              | 0.42 |
|                |            |                |                     | H-2 -> L+1            | 0.22 |
|                |            |                |                     | H-2 -> L+2            | 0.13 |
| 13             | 5.22       | 238            | 0.12                | H-2 -> L+2            | 0.72 |
| 14             | 5.36       | 231            | 0.07                | H-2 -> L+3            | 0.74 |
| 15             | 5.49       | 226            | 0.02                | H-5 -> L              | 0.56 |
|                |            |                |                     | H-4 -> L+1            | 0.19 |

<sup>a</sup> H = HOMO, L = LUMO

Table S2: Calculated properties for the first 15 transitions for **3aH** as determined by TD-DFT<sup>a</sup>

| Transition no. | Energy /eV | Wavelength /nm | Oscillator strength | Leading configuration |      |
|----------------|------------|----------------|---------------------|-----------------------|------|
| 1              | 2.38       | 522            | 0.27                | H -> L                | 0.36 |
|                |            |                |                     | H -> L+1              | 0.63 |
| 2              | 2.52       | 493            | 0.71                | H -> L                | 0.64 |
|                |            |                |                     | H -> L+1              | 0.36 |
| 3              | 3.27       | 379            | 0.00                | H-1 -> L              | 0.91 |
| 4              | 3.43       | 361            | 0.07                | H-2 -> L              | 0.77 |
| 5              | 3.65       | 340            | 0.07                | H-2 -> L+1            | 0.63 |
|                |            |                |                     | H-1 -> L+1            | 0.21 |
| 6              | 3.82       | 324            | 0.01                | H-2 -> L+1            | 0.20 |
|                |            |                |                     | H-1 -> L+1            | 0.77 |
| 7              | 3.89       | 318            | 0.16                | H-3 -> L              | 0.82 |
|                |            |                |                     | H -> L+2              | 0.11 |
| 8              | 4.22       | 294            | 0.05                | H-3 -> L              | 0.84 |
| 9              | 4.47       | 277            | 0.22                | H -> L+2              | 0.73 |
| 10             | 4.74       | 262            | 0.01                | H-4 -> L              | 0.58 |
| 11             | 4.78       | 259            | 0.09                | H -> L+3              | 0.24 |
|                |            |                |                     | H-4 -> L              | 0.21 |
| 12             | 4.99       | 249            | 0.00                | H -> L+3              | 0.54 |
| 13             | 5.06       | 245            | 0.16                | H-5 -> L              | 0.96 |
|                |            |                |                     | H-6 -> L              | 0.27 |
|                |            |                |                     | H-4 -> L+1            | 0.60 |
| 14             | 5.24       | 237            | 0.00                | H-9 -> L              | 0.12 |
|                |            |                |                     | H-7 -> L              | 0.80 |
| 15             | 5.32       | 233            | 0.00                | H-9 -> L              | 0.57 |
|                |            |                |                     | H-8 -> L              | 0.18 |

<sup>a</sup> H = HOMO, L = LUMO

Table S3: Calculated properties for the first 15 transitions for **3b** as determined by TD-DFT<sup>a</sup>

| Transition no. | Energy /eV | Wavelength /nm | Oscillator strength | Leading configuration |      |
|----------------|------------|----------------|---------------------|-----------------------|------|
| 1              | 1.9263     | 643.65         | 0.041               | H -> L                | 0.90 |
| 2              | 2.5963     | 477.55         | 1.3718              | H-1 -> L              | 0.95 |
| 3              | 2.9044     | 426.88         | 0.0082              | H -> L+1              | 0.73 |
| 4              | 3.1808     | 389.79         | 0.5176              | H-2 -> L              | 0.50 |
|                |            |                |                     | H-1 -> L+1            | 0.29 |
| 5              | 3.2689     | 379.28         | 0.5495              | H-1 -> L+1            | 0.51 |
|                |            |                |                     | H -> L+1              | 0.10 |
|                |            |                |                     | H -> L+2              | 0.26 |
| 6              | 3.4402     | 360.4          | 0.0301              | H-3 -> L              | 0.31 |
|                |            |                |                     | H-2 -> L              | 0.24 |
|                |            |                |                     | H-1 -> L+2            | 0.10 |
|                |            |                |                     | H -> L+2              | 0.21 |
| 7              | 3.6608     | 338.68         | 0.0034              | H-1 -> L+2            | 0.80 |
| 8              | 3.7297     | 332.42         | 0.0514              | H-3 -> L              | 0.30 |
|                |            |                |                     | H-2 -> L+1            | 0.36 |
|                |            |                |                     | H -> L+2              | 0.12 |
| 9              | 3.8537     | 321.73         | 0.0094              | H-2 -> L+1            | 0.31 |
|                |            |                |                     | H-1 -> L+3            | 0.12 |
|                |            |                |                     | H -> L+4              | 0.38 |
| 10             | 3.8633     | 320.93         | 0.0077              | H-6 -> L              | 0.10 |
|                |            |                |                     | H-1 -> L+3            | 0.27 |
|                |            |                |                     | H-1 -> L+4            | 0.11 |
|                |            |                |                     | H -> L+3              | 0.34 |
| 11             | 3.9751     | 311.91         | 0.0005              | H-1 -> L+3            | 0.24 |
|                |            |                |                     | H -> L+3              | 0.51 |
|                |            |                |                     | H -> L+4              | 0.13 |
| 12             | 4.0233     | 308.16         | 0.0787              | H-5 -> L              | 0.17 |
|                |            |                |                     | H-4 -> L              | 0.30 |
|                |            |                |                     | H-1 -> L+4            | 0.13 |
| 13             | 4.0811     | 303.8          | 0.0507              | H-4 -> L              | 0.34 |
|                |            |                |                     | H-1 -> L+4            | 0.12 |
|                |            |                |                     | H -> L+4              | 0.12 |
| 14             | 4.1255     | 300.53         | 0.0618              | H-5 -> L              | 0.18 |
|                |            |                |                     | H-2 -> L+2            | 0.47 |
| 15             | 4.2128     | 294.31         | 0.0526              | H-5 -> L              | 0.10 |
|                |            |                |                     | H-1 -> L+4            | 0.15 |
|                |            |                |                     | H-1 -> L+5            | 0.30 |

<sup>a</sup> H = HOMO, L = LUMO

Table S4: Calculated properties for the first 15 transitions for **3b** as determined by TD-DFT<sup>a</sup>

| Transition no. | Energy /eV | Wavelength /nm | Oscillator strength | Leading configuration |      |
|----------------|------------|----------------|---------------------|-----------------------|------|
| 1              | 1.23       | 1009           | 0.86                | H -> L                | 0.99 |
| 2              | 1.48       | 839            | 0.08                | H -> L+1              | 0.97 |
| 3              | 2.18       | 569            | 0.81                | H-1 -> L              | 0.91 |
| 4              | 2.51       | 494            | 0.08                | H-1 -> L+1            | 0.92 |
| 5              | 2.57       | 482            | 0.07                | H-2 -> L              | 0.95 |
| 6              | 2.71       | 458            | 0.27                | H-4 -> L              | 0.14 |
|                |            |                |                     | H-3 -> L              | 0.30 |
|                |            |                |                     | H -> L+2              | 0.50 |
| 7              | 2.74       | 453            | 0.08                | H-3 -> L              | 0.69 |
|                |            |                |                     | H -> L+2              | 0.18 |
| 8              | 3.01       | 411            | 0.04                | H-4 -> L              | 0.69 |
|                |            |                |                     | H -> L+2              | 0.17 |
| 9              | 3.09       | 402            | 0.04                | H-5 -> L              | 0.91 |
| 10             | 3.16       | 392            | 0.01                | H-2 -> L+1            | 0.96 |
| 11             | 3.34       | 371            | 0.03                | H-4 -> L+1            | 0.62 |
|                |            |                |                     | H-3 -> L+1            | 0.23 |
| 12             | 3.38       | 366            | 0.01                | H-4 -> L+1            | 0.19 |
|                |            |                |                     | H-3 -> L+1            | 0.77 |
| 13             | 3.47       | 358            | 0.41                | H -> L+3              | 0.84 |
| 14             | 3.54       | 350            | 0.12                | H-6 -> L              | 0.76 |
| 15             | 3.67       | 338            | 0.05                | H -> L+4              | 0.76 |

<sup>a</sup> H = HOMO, L = LUMO

Table S5: Calculated properties for the first 15 transitions for **3c** as determined by TD-DFT<sup>a</sup>

| Transition no. | Energy /eV | Wavelength /nm | Oscillator strength | Leading configuration |      |
|----------------|------------|----------------|---------------------|-----------------------|------|
| 1              | 1.81       | 686            | 0.08                | H-1 -> L              | 0.19 |
|                |            |                |                     | H -> L                | 0.71 |
| 2              | 2.28       | 543            | 2.21                | H-1 -> L              | 0.76 |
|                |            |                |                     | H -> L                | 0.23 |
| 3              | 2.67       | 464            | 0.16                | H-2 -> L              | 0.17 |
|                |            |                |                     | H -> L+1              | 0.60 |
| 4              | 2.78       | 446            | 0.52                | H-2 -> L              | 0.61 |
|                |            |                |                     | H-1 -> L+1            | 0.29 |
| 5              | 2.95       | 421            | 0.28                | H-2 -> L              | 0.17 |
|                |            |                |                     | H-1 -> L+1            | 0.54 |
|                |            |                |                     | H -> L+1              | 0.18 |
| 6              | 3.10       | 400            | 0.02                | H-3 -> L              | 0.30 |
|                |            |                |                     | H -> L+2              | 0.39 |
| 7              | 3.29       | 376            | 0.11                | H-3 -> L              | 0.15 |
|                |            |                |                     | H-2 -> L+1            | 0.55 |
|                |            |                |                     | H -> L+2              | 0.16 |
| 8              | 3.35       | 370            | 0.01                | H-1 -> L+2            | 0.72 |
| 9              | 3.43       | 362            | 0.00                | H-3 -> L              | 0.11 |
|                |            |                |                     | H-2 -> L+1            | 0.22 |
|                |            |                |                     | H-1 -> L+3            | 0.26 |
| 10             | 3.48       | 356            | 0.03                | H -> L+2              | 0.22 |
|                |            |                |                     | H-4 -> L              | 0.10 |
|                |            |                |                     | H-1 -> L+3            | 0.16 |
| 11             | 3.68       | 336            | 0.01                | H -> L+3              | 0.52 |
|                |            |                |                     | H-4 -> L              | 0.64 |
|                |            |                |                     | H-2 -> L+2            | 0.11 |
| 12             | 3.77       | 329            | 0.25                | H-3 -> L              | 0.16 |
|                |            |                |                     | H-2 -> L+1            | 0.10 |
|                |            |                |                     | H-1 -> L+2            | 0.18 |
| 13             | 3.78       | 328            | 0.01                | H-1 -> L+3            | 0.18 |
|                |            |                |                     | H-6 -> L              | 0.12 |
|                |            |                |                     | H-1 -> L+4            | 0.36 |
| 14             | 3.85       | 322            | 0.16                | H -> L+4              | 0.27 |
|                |            |                |                     | H-3 -> L+1            | 0.18 |
|                |            |                |                     | H-2 -> L+2            | 0.52 |
| 15             | 3.96       | 313            | 0.02                | H-1 -> L+3            | 0.10 |
|                |            |                |                     | H-5 -> L              | 0.16 |

| Transition no. | Energy /eV | Wavelength /nm | Oscillator strength | Leading configuration |      |
|----------------|------------|----------------|---------------------|-----------------------|------|
|                |            |                |                     | H-3 -> L+1            | 0.19 |
|                |            |                |                     | H-2 -> L+3            | 0.29 |

<sup>a</sup> H = HOMO, L = LUMO

Table S6: Calculated properties for the first 15 transitions for **3cH** as determined by TD-DFT<sup>a</sup>

| Transition no. | Energy /eV | Wavelength /nm | Oscillator strength | Leading configuration |      |
|----------------|------------|----------------|---------------------|-----------------------|------|
| 1              | 0.97       | 1273           | 0.89                | H -> L                | 1.01 |
| 2              | 1.41       | 877            | 0.02                | H -> L+1              | 0.98 |
| 3              | 1.78       | 698            | 1.49                | H-1 -> L              | 0.90 |
| 4              | 2.13       | 582            | 0.09                | H-1 -> L+1            | 0.92 |
| 5              | 2.15       | 578            | 0.30                | H-2 -> L              | 0.28 |
|                |            |                |                     | H -> L+2              | 0.65 |
| 6              | 2.42       | 511            | 0.09                | H-3 -> L              | 0.27 |
|                |            |                |                     | H-2 -> L              | 0.53 |
|                |            |                |                     | H -> L+2              | 0.14 |
| 7              | 2.49       | 498            | 0.12                | H-3 -> L              | 0.68 |
|                |            |                |                     | H-2 -> L              | 0.13 |
| 8              | 2.55       | 486            | 0.02                | H-4 -> L              | 0.95 |
| 9              | 2.83       | 437            | 0.01                | H-5 -> L              | 0.85 |
| 10             | 2.86       | 433            | 0.03                | H-2 -> L+1            | 0.83 |
| 11             | 2.91       | 426            | 0.31                | H-6 -> L              | 0.38 |
|                |            |                |                     | H-1 -> L+2            | 0.47 |
| 12             | 2.95       | 420            | 0.16                | H-1 -> L+3            | 0.83 |
| 13             | 3.16       | 392            | 0.00                | H-3 -> L+1            | 0.95 |
| 14             | 3.21       | 387            | 0.06                | H-6 -> L              | 0.32 |
|                |            |                |                     | H-1 -> L+2            | 0.35 |
|                |            |                |                     | H-1 -> L+4            | 0.10 |
| 15             | 3.30       | 376            | 0.00                | H-4 -> L+1            | 0.99 |

<sup>a</sup> H = HOMO, L = LUMO

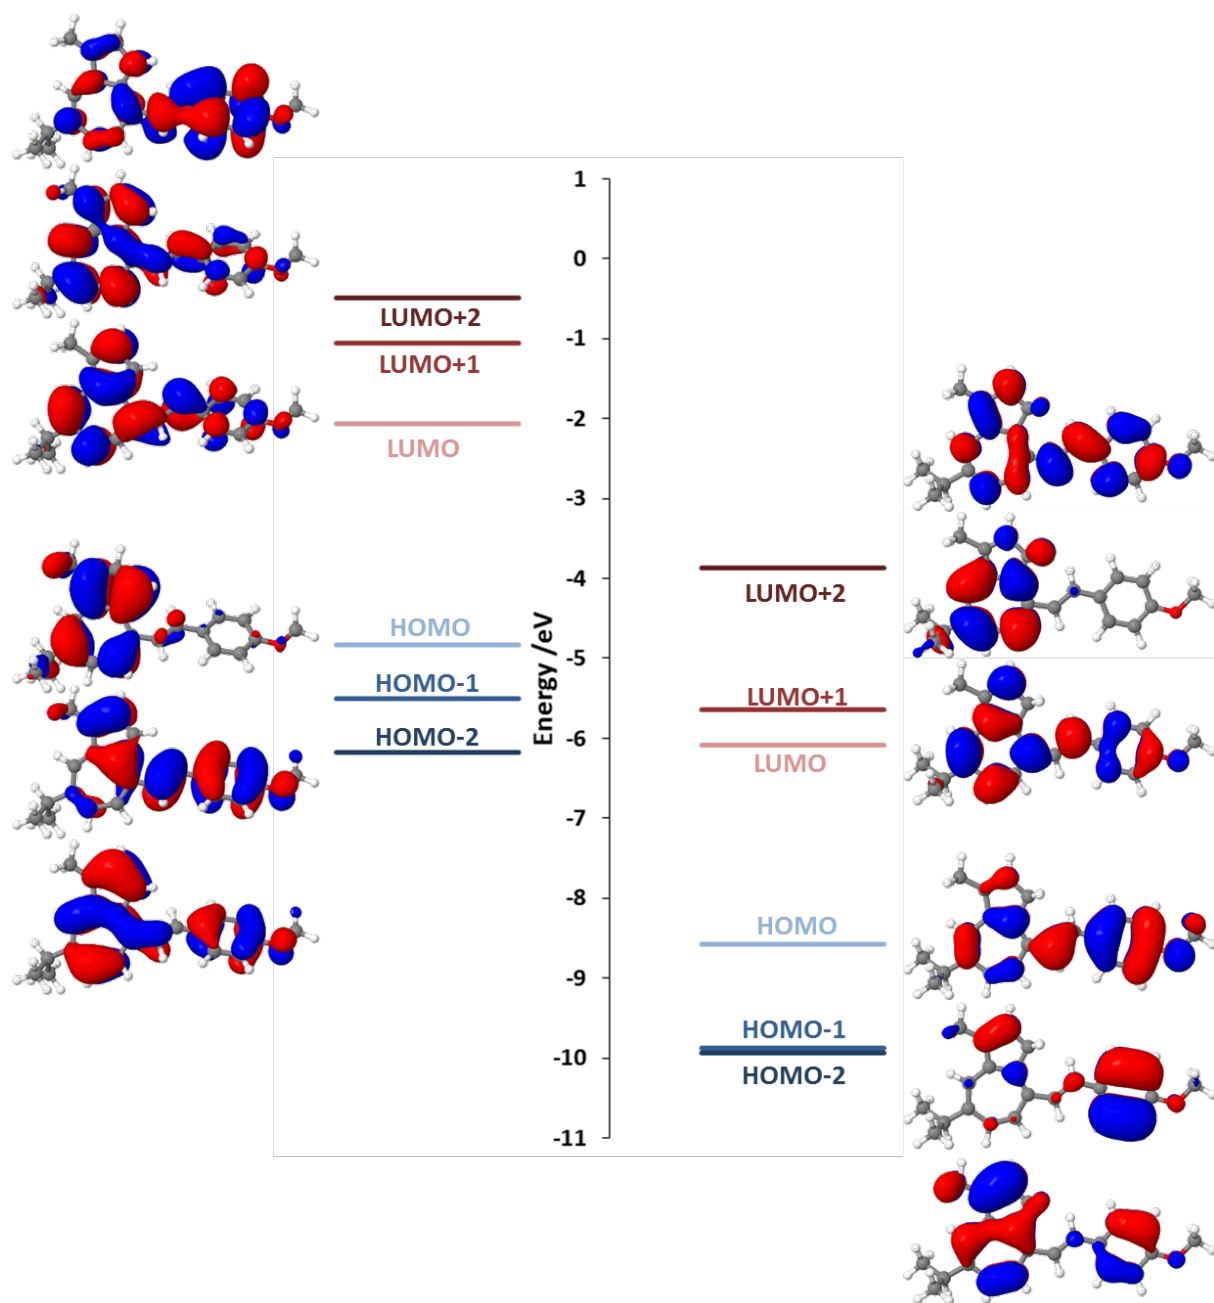

Figure S1: Frontier molecular orbitals of 3a and 3aH<sup>+</sup>



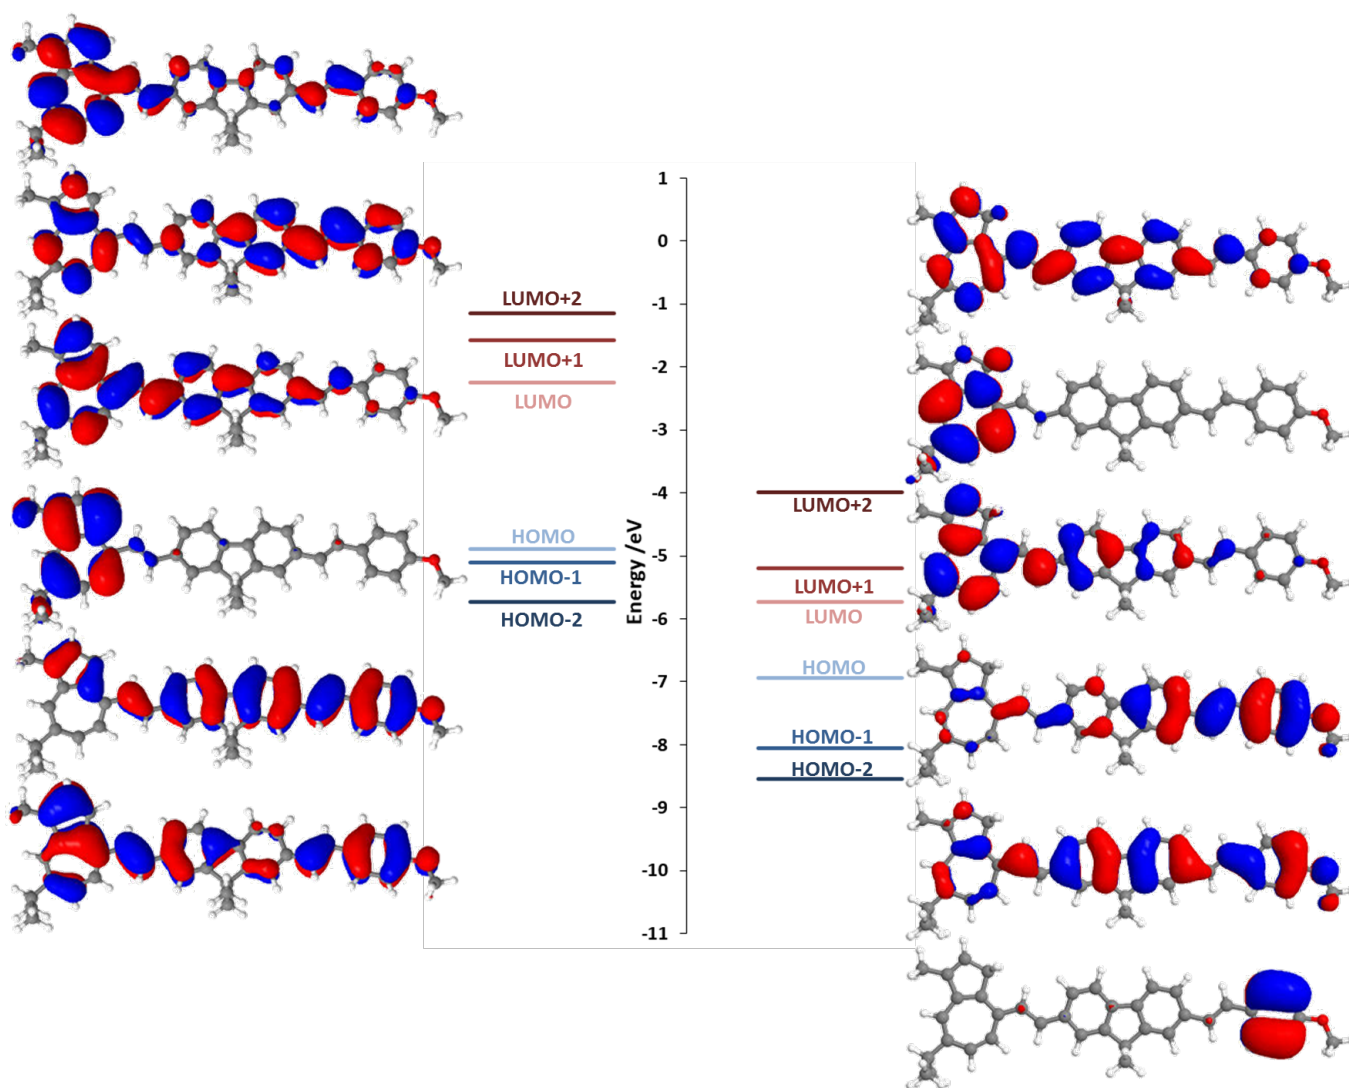

Figure S2: Frontier molecular orbitals of **3b** and **3bH<sup>+</sup>**

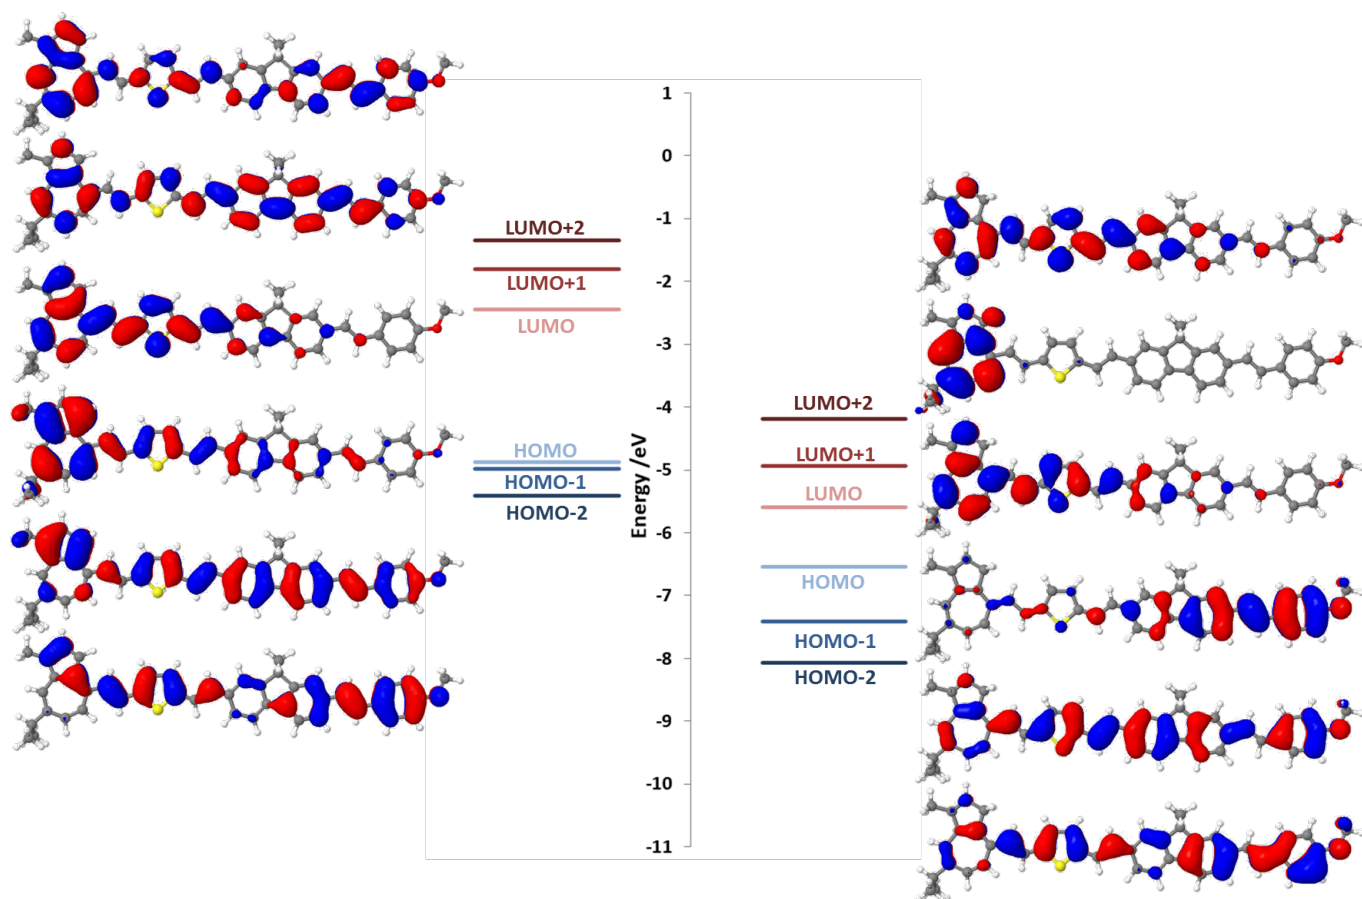

Figure S3: Frontier molecular orbitals of 3c and 3cH<sup>+</sup>

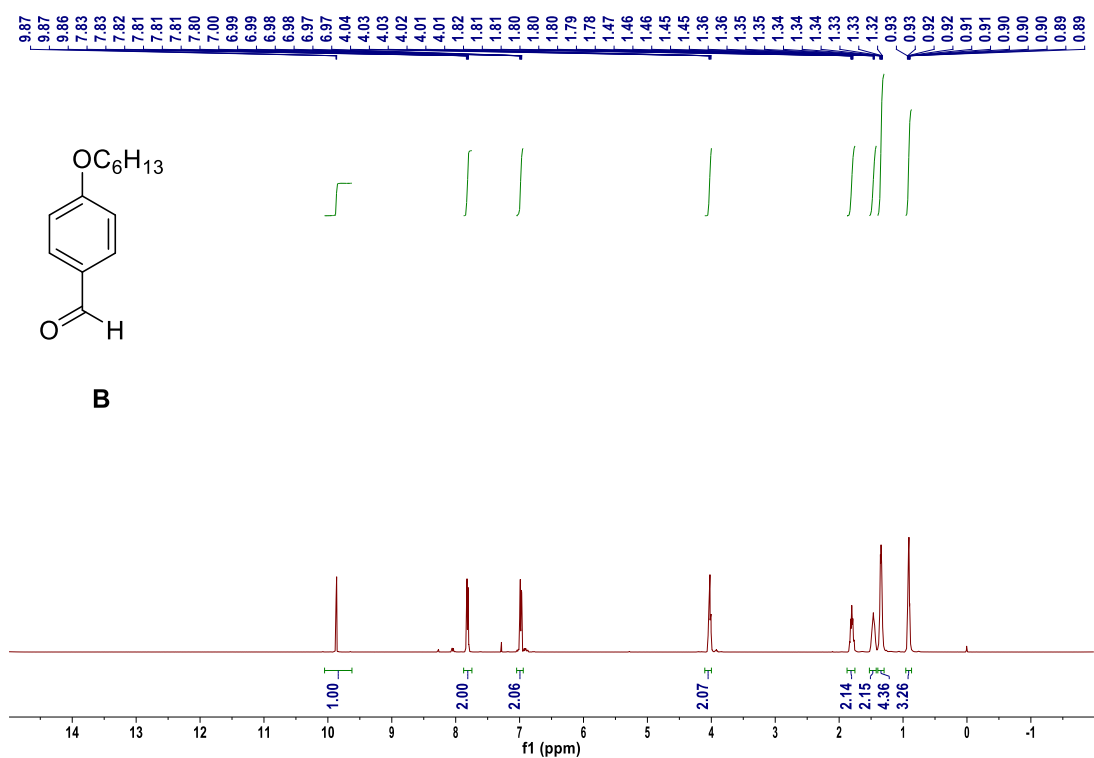

Figure S4: <sup>1</sup>H NMR spectrum for intermediate **B**

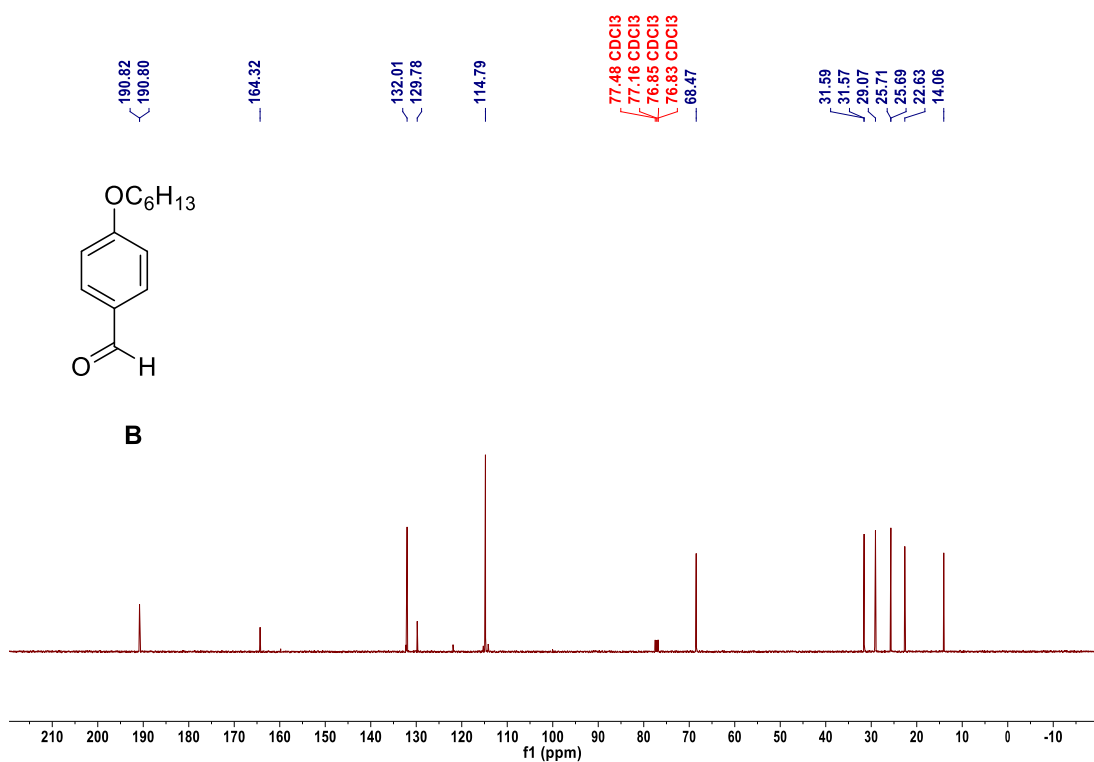

Figure S5: <sup>13</sup>C NMR spectrum for intermediate **B**

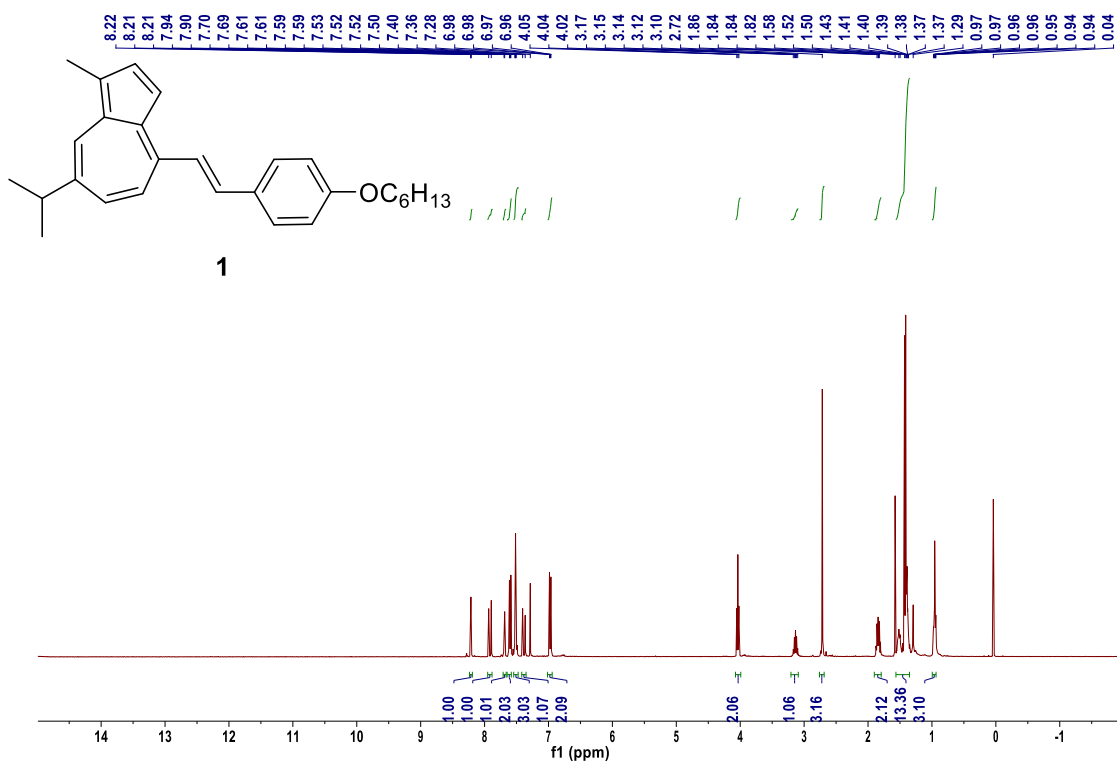

Figure S6: <sup>1</sup>H NMR spectrum for **3a**

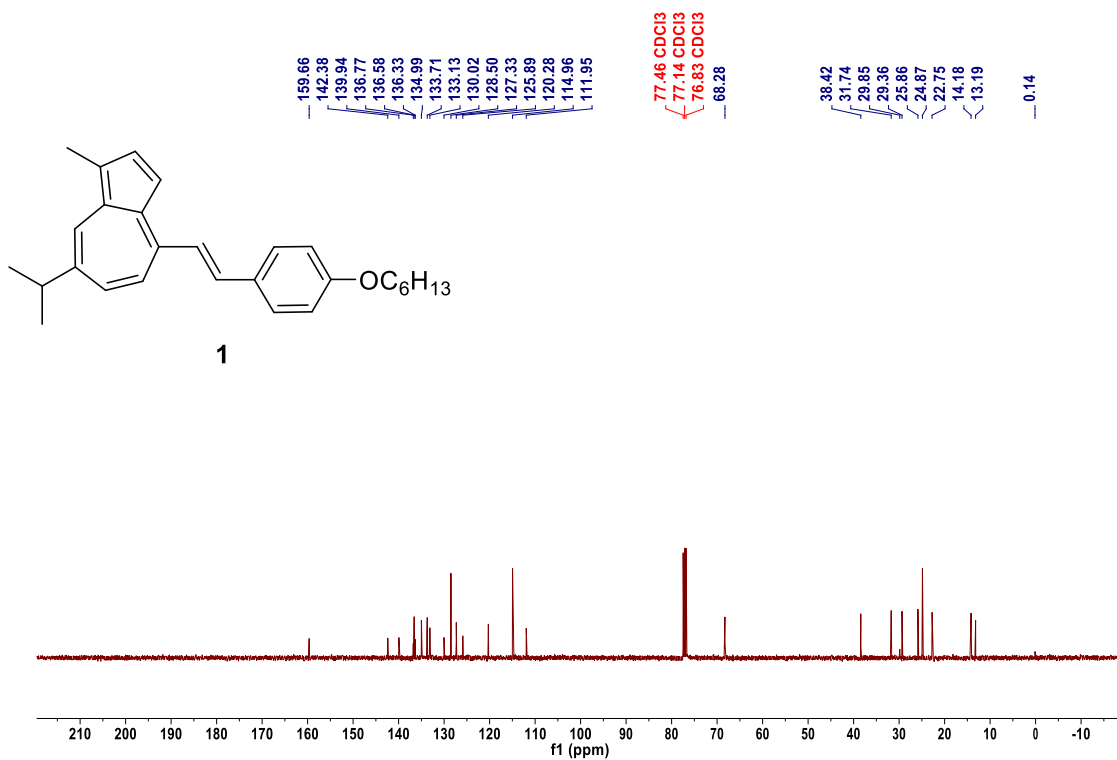

Figure S7: <sup>13</sup>C NMR spectrum for **3a**

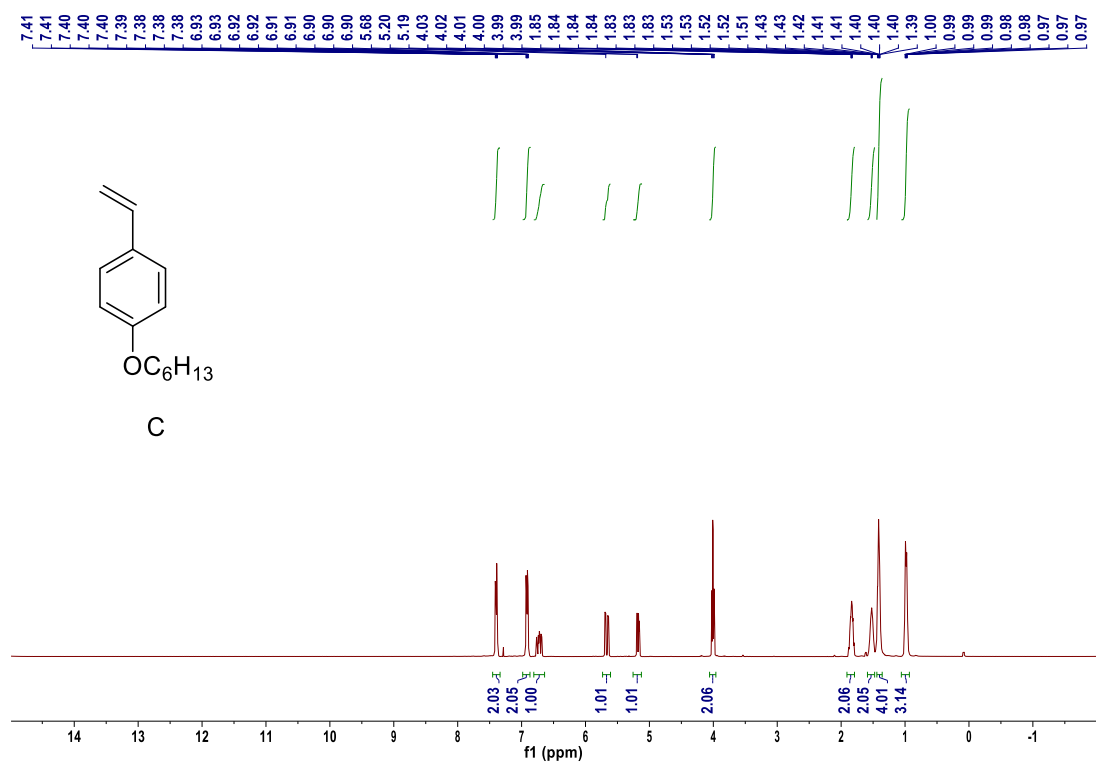

Figure S8:  $^1\text{H}$  NMR spectrum for intermediate C

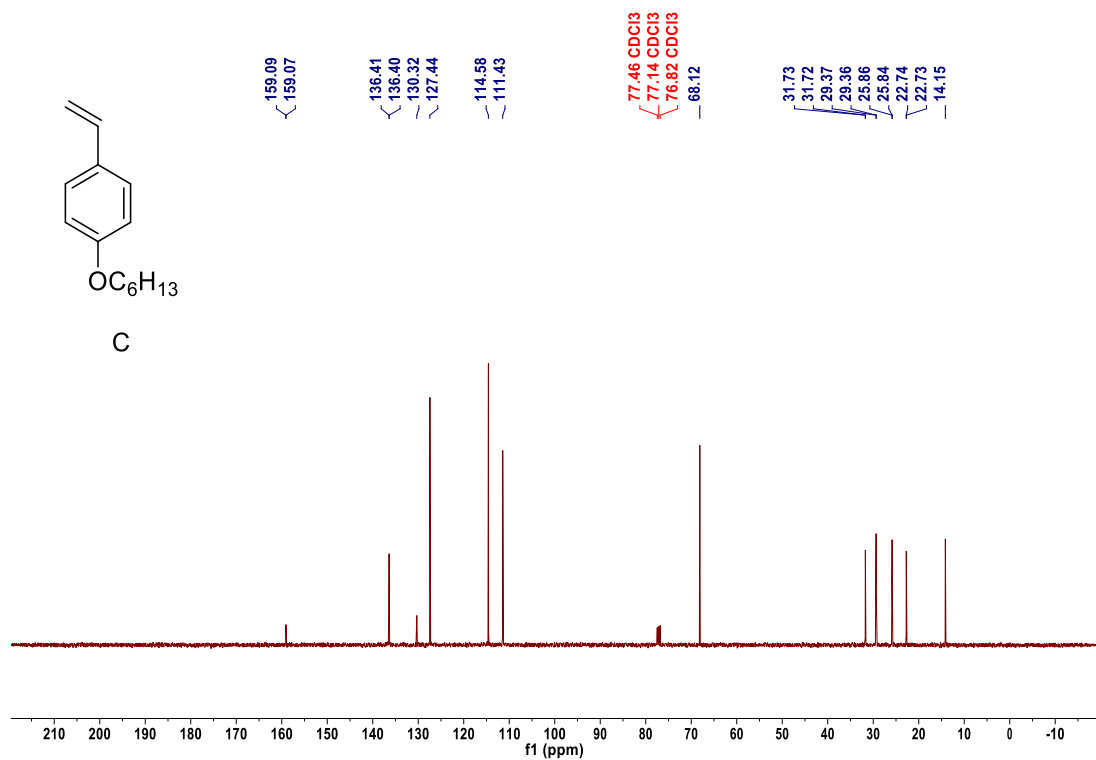

Figure S9:  $^{13}\text{C}$  NMR spectrum for intermediate C

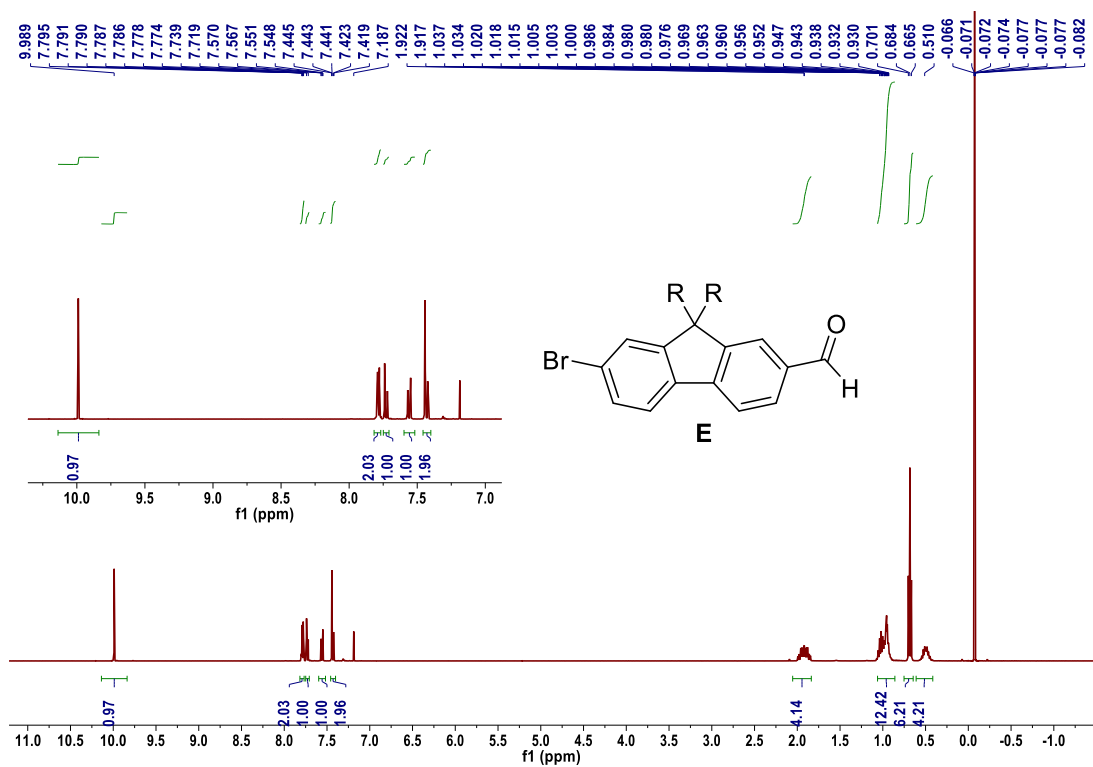

Figure S10: <sup>1</sup>H NMR spectrum for intermediate E

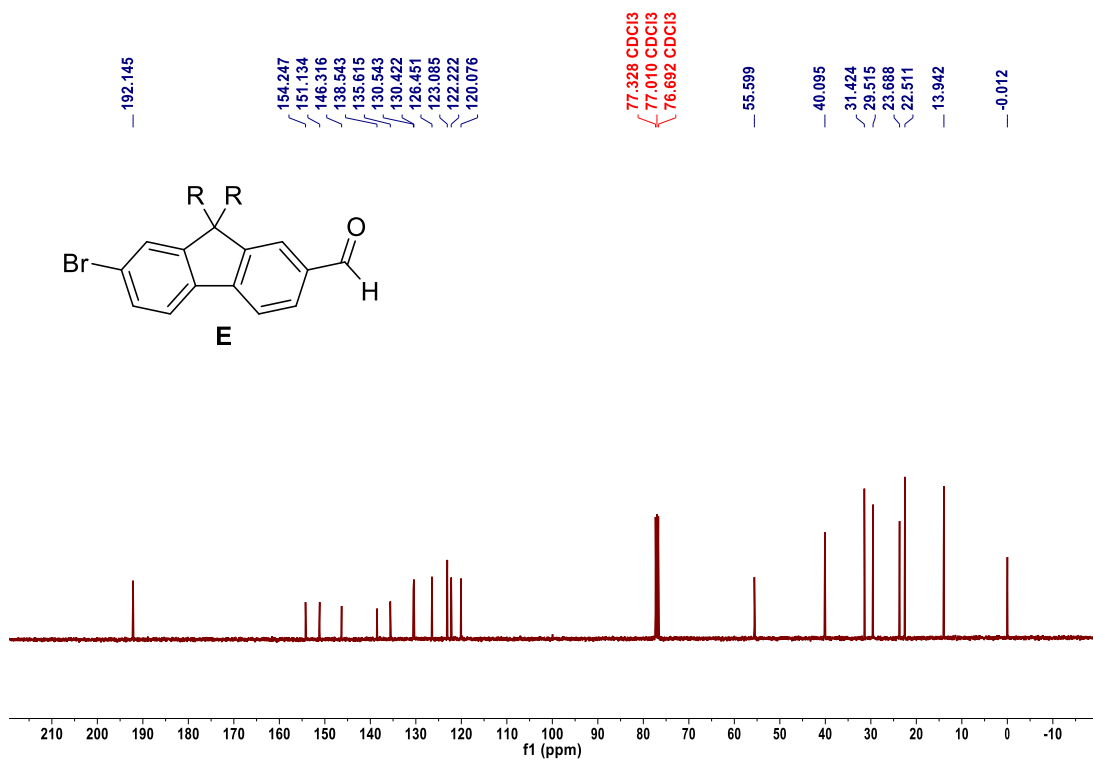

Figure S11: <sup>13</sup>C NMR spectrum for intermediate E

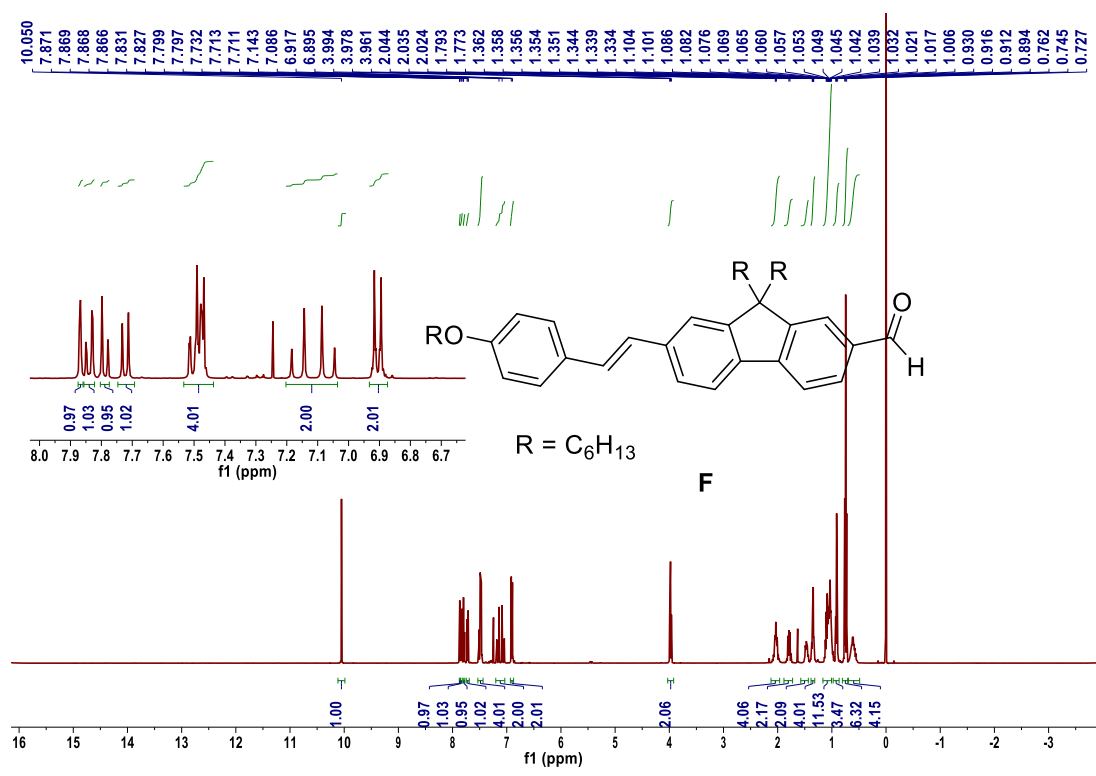

Figure S12: <sup>1</sup>H NMR spectrum for intermediate F

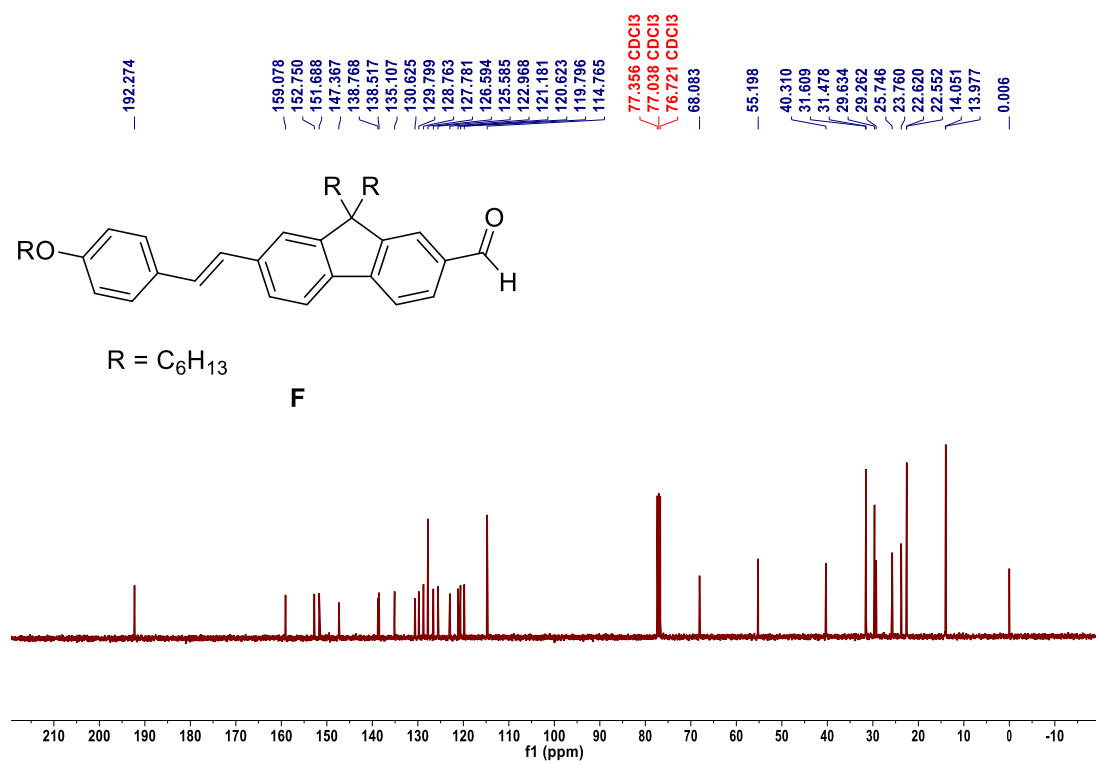

Figure S13: <sup>13</sup>C NMR spectrum for intermediate F

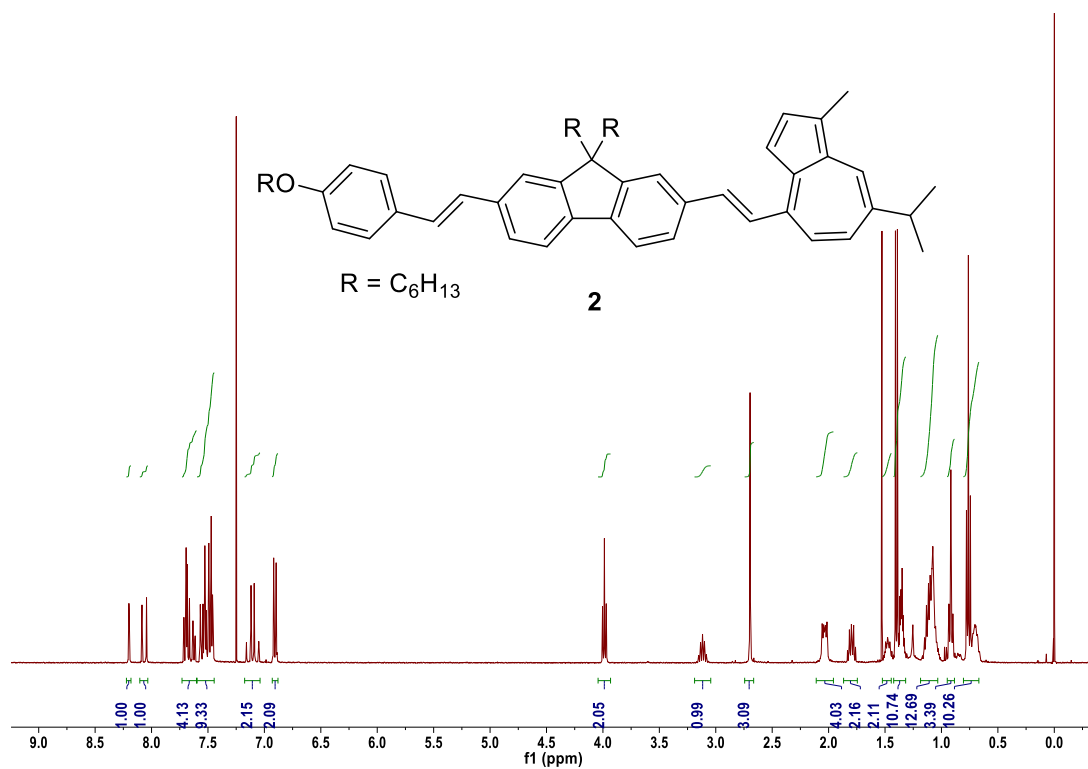

Figure S14: <sup>1</sup>H NMR spectrum for **3b**

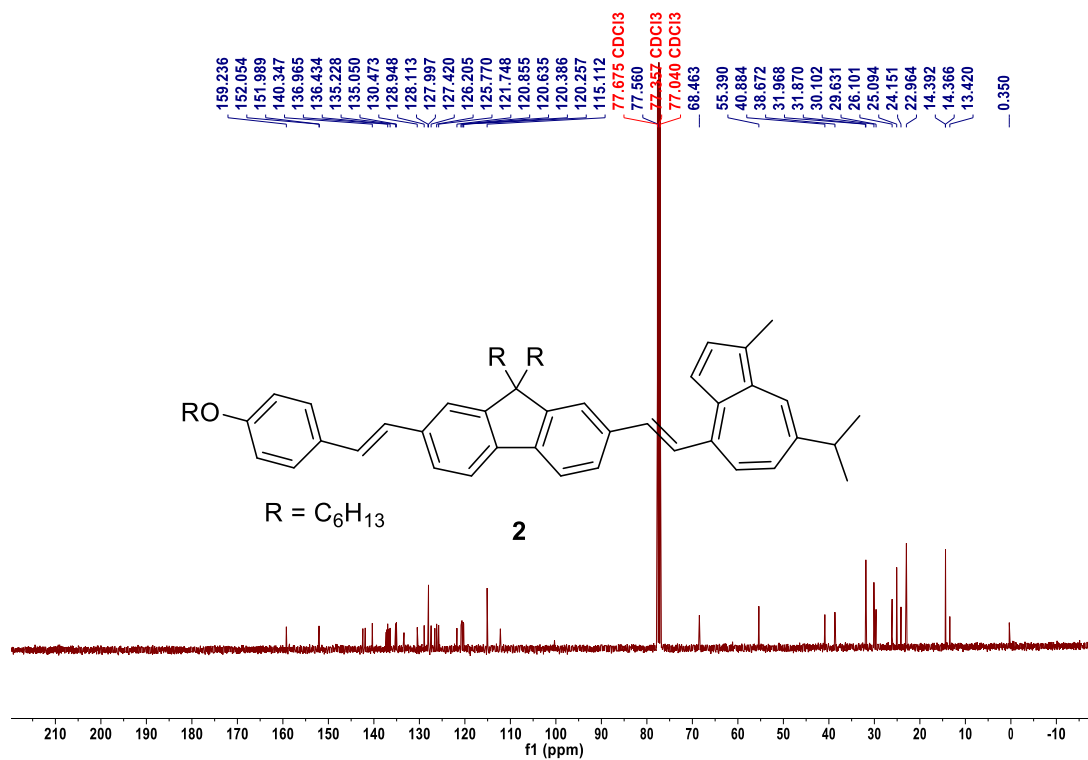

Figure S15: <sup>13</sup>C NMR spectrum for **3b**





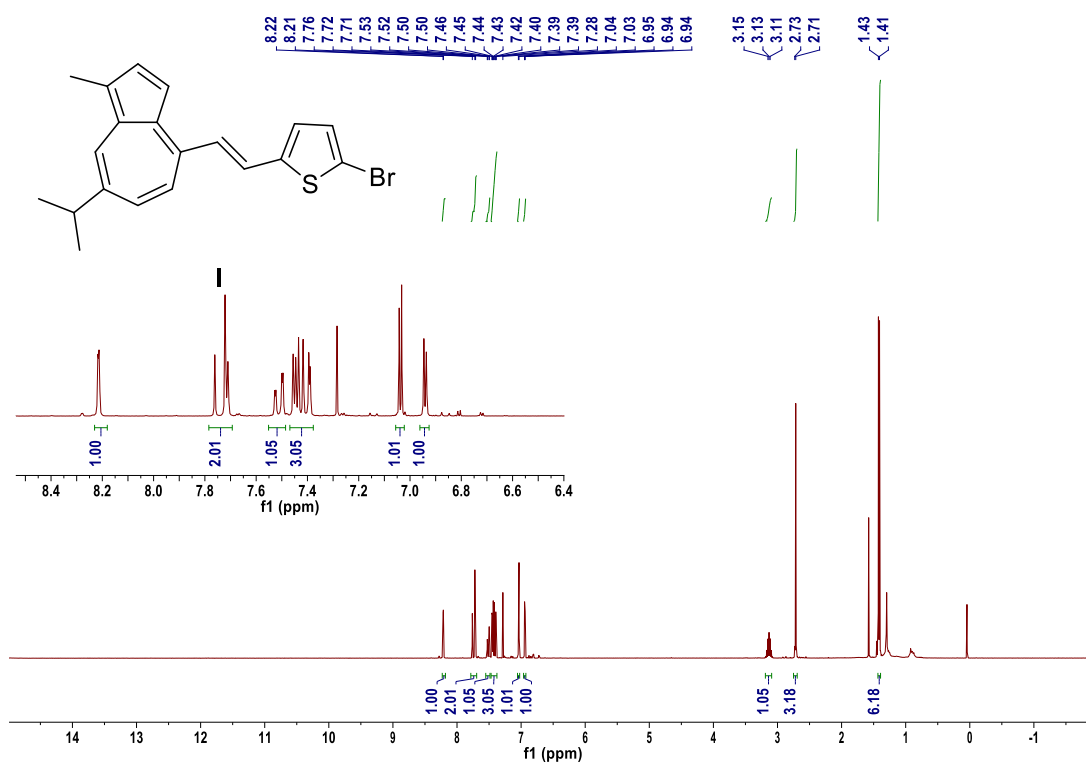

Figure S18: <sup>1</sup>H NMR spectrum for intermediate I

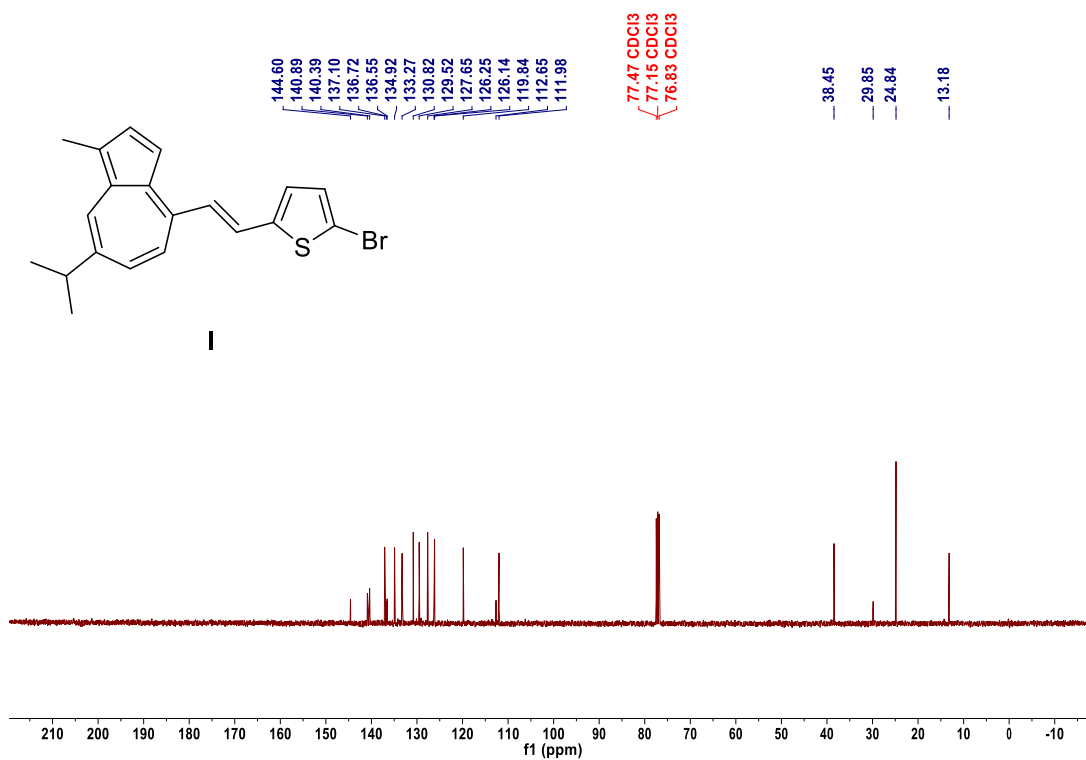

Figure S19: <sup>13</sup>C NMR spectrum for intermediate I

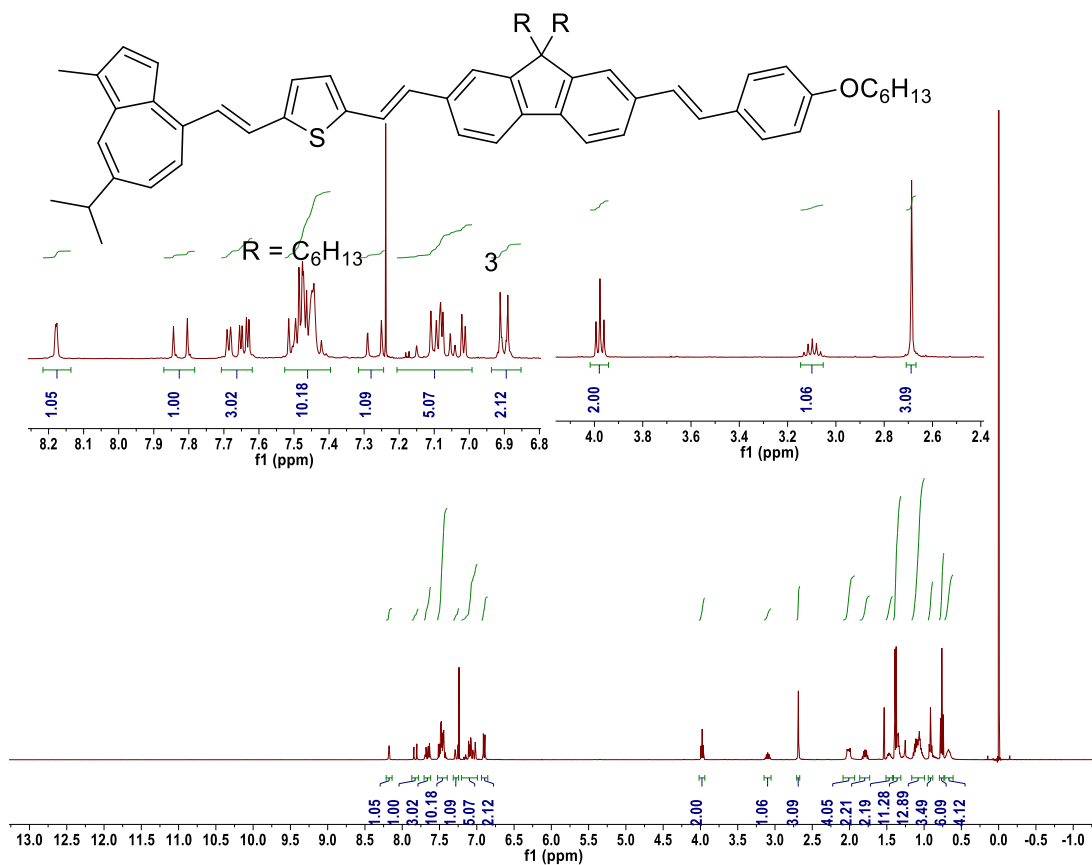

Figure S20: <sup>1</sup>H NMR spectrum for **3c**

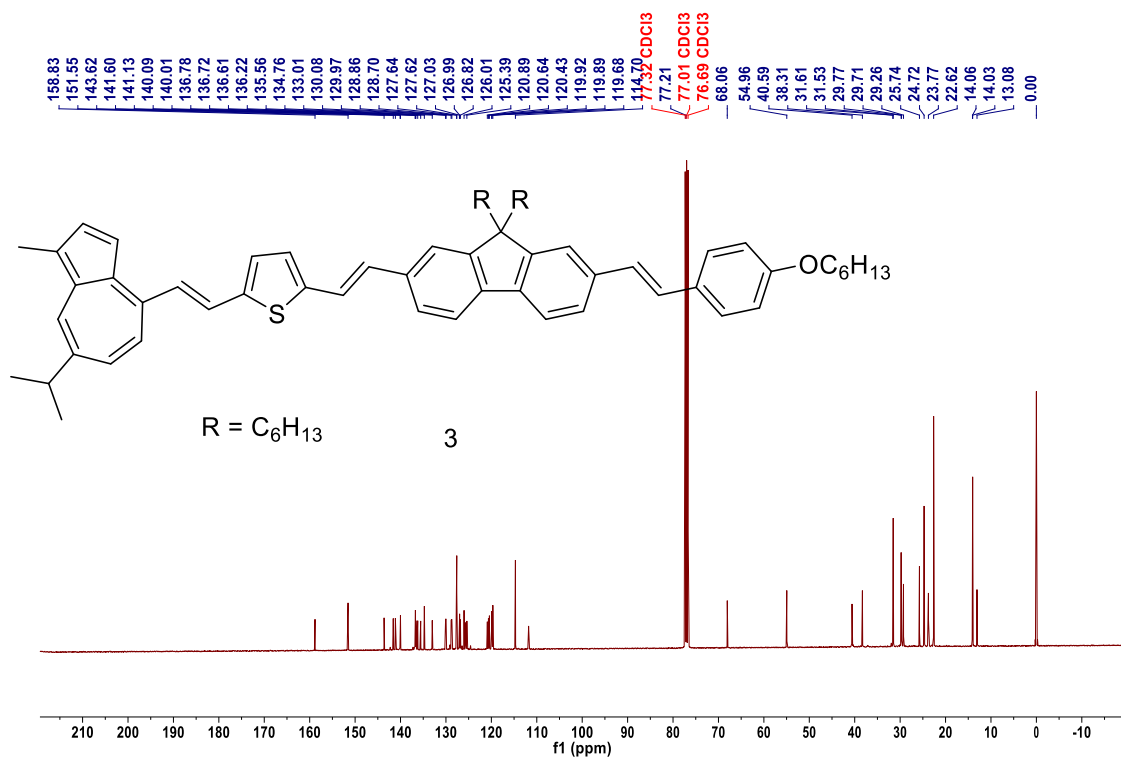

Figure S21: <sup>13</sup>C NMR spectrum for **3c**
